# Supplementary material for: Lack of Impact of Posidonia oceanica Leaf Nutrient Enrichment on Sarpa salpa Herbivory: Additional Evidence for the Generalist Consumer Behavior of This Cornerstone Mediterranean Herbivore
Source: PLoS One. 2016 Dec 19;11(12):e0168398. doi: 10.1371/journal.pone.0168398 (PMC5167388; doi:10.1371/journal.pone.0168398)
Supplement: S1 Data — (XLSX) [file pone.0168398.s001.xlsx]

## Sheet: GROWTH
LOCATION	SITE	TREATMENT	PLOT	Growth (cm2/shoot.day)
CIMAR	1	Control	1	0.45225
CIMAR	1	Control	2	0.4444
CIMAR	1	Control	3	0.4983
CIMAR	1	Fertilized	1	0.638892
CIMAR	1	Fertilized	2	0.466028
CIMAR	1	Fertilized	3	0.355783
CIMAR	2	Control	1	0.5099
CIMAR	2	Control	2	0.629783
CIMAR	2	Control	3	0.412733
CIMAR	2	Fertilized	1	0.665738
CIMAR	2	Fertilized	2	0.346148
CIMAR	2	Fertilized	3	0.786967
CIMAR	3	Control	1	0.582148
CIMAR	3	Control	2	0.7156
CIMAR	3	Control	3	0.607426
CIMAR	3	Fertilized	1	0.290259
CIMAR	3	Fertilized	2	0.299533
CIMAR	3	Fertilized	3	0.213312
TABARCA	4	Control	1	0.928683
TABARCA	4	Control	2	0.889777
TABARCA	4	Control	3	0.85087
TABARCA	4	Fertilized	1	0.475917
TABARCA	4	Fertilized	2	0.495633
TABARCA	4	Fertilized	3	0.67825
TABARCA	5	Control	1	0.252667
TABARCA	5	Control	2	0.262167
TABARCA	5	Control	3	0.363333
TABARCA	5	Fertilized	1	0.247017
TABARCA	5	Fertilized	2	0.419125
TABARCA	5	Fertilized	3	0.380708
TABARCA	6	Control	1	0.429037
TABARCA	6	Control	2	0.345208
TABARCA	6	Control	3	0.231033
TABARCA	6	Fertilized	1	0.168292
TABARCA	6	Fertilized	2	0.372317
TABARCA	6	Fertilized	3	0.39345
