# Supplementary material for: Lack of Impact of Posidonia oceanica Leaf Nutrient Enrichment on Sarpa salpa Herbivory: Additional Evidence for the Generalist Consumer Behavior of This Cornerstone Mediterranean Herbivore
Source: PLoS One. 2016 Dec 19;11(12):e0168398. doi: 10.1371/journal.pone.0168398 (PMC5167388; doi:10.1371/journal.pone.0168398)
Supplement: S2 Data — (XLSX) [file pone.0168398.s002.xlsx]

## Sheet: LEAF-CN
LOCATION	SITE	TREATMENT	PLOT	C:N-leaves
CIMAR	1	Control	1	51.2955
CIMAR	1	Control	2	55.6151
CIMAR	1	Control	3	48.2861
CIMAR	1	Fertilized	1	38.1181
CIMAR	1	Fertilized	2	28.1944
CIMAR	1	Fertilized	3	48.9211
CIMAR	2	Control	1	50.3595
CIMAR	2	Control	2	44.0795
CIMAR	2	Control	3	47.842
CIMAR	2	Fertilized	1	36.1476
CIMAR	2	Fertilized	2	34.1047
CIMAR	2	Fertilized	3	46.3091
CIMAR	3	Control	1	50.9889
CIMAR	3	Control	2	42.4125
CIMAR	3	Control	3	48.9806
CIMAR	3	Fertilized	1	52.2333
CIMAR	3	Fertilized	2	39.8904
CIMAR	3	Fertilized	3	41.3689
Tabarca	4	Control	1	38.1593
Tabarca	4	Control	2	37.562
Tabarca	4	Control	3	36.9647
Tabarca	4	Fertilized	1	24.7921
Tabarca	4	Fertilized	2	27.4163
Tabarca	4	Fertilized	3	28.3772
Tabarca	5	Control	1	67.4206
Tabarca	5	Control	2	45.1869
Tabarca	5	Control	3	44.5833
Tabarca	5	Fertilized	1	46.9079
Tabarca	5	Fertilized	2	49.2436
Tabarca	5	Fertilized	3	38.4443
Tabarca	6	Control	1	40.7354
Tabarca	6	Control	2	68.9339
Tabarca	6	Control	3	71.254
Tabarca	6	Fertilized	1	35.7407
Tabarca	6	Fertilized	2	48.1396
Tabarca	6	Fertilized	3	39.2115
