# Supplementary material for: Lack of Impact of Posidonia oceanica Leaf Nutrient Enrichment on Sarpa salpa Herbivory: Additional Evidence for the Generalist Consumer Behavior of This Cornerstone Mediterranean Herbivore
Source: PLoS One. 2016 Dec 19;11(12):e0168398. doi: 10.1371/journal.pone.0168398 (PMC5167388; doi:10.1371/journal.pone.0168398)
Supplement: S3 Data — (XLSX) [file pone.0168398.s003.xlsx]

## Sheet: Growth
LOCATION	SITE	TREATMENT	PLOT	Growth (cm2/shoot.day)
CIMAR	1	Control	1	0.45225
CIMAR	1	Control	2	0.4444
CIMAR	1	Control	3	0.4983
CIMAR	1	Fertilized	1	0.638892
CIMAR	1	Fertilized	2	0.466028
CIMAR	1	Fertilized	3	0.355783
CIMAR	2	Control	1	0.5099
CIMAR	2	Control	2	0.629783
CIMAR	2	Control	3	0.412733
CIMAR	2	Fertilized	1	0.665738
CIMAR	2	Fertilized	2	0.346148
CIMAR	2	Fertilized	3	0.786967
CIMAR	3	Control	1	0.582148
CIMAR	3	Control	2	0.7156
CIMAR	3	Control	3	0.607426
CIMAR	3	Fertilized	1	0.290259
CIMAR	3	Fertilized	2	0.299533
CIMAR	3	Fertilized	3	0.213312
TABARCA	4	Control	1	0.928683
TABARCA	4	Control	2	0.889777
TABARCA	4	Control	3	0.85087
TABARCA	4	Fertilized	1	0.475917
TABARCA	4	Fertilized	2	0.495633
TABARCA	4	Fertilized	3	0.67825
TABARCA	5	Control	1	0.252667
TABARCA	5	Control	2	0.262167
TABARCA	5	Control	3	0.363333
TABARCA	5	Fertilized	1	0.247017
TABARCA	5	Fertilized	2	0.419125
TABARCA	5	Fertilized	3	0.380708
TABARCA	6	Control	1	0.429037
TABARCA	6	Control	2	0.345208
TABARCA	6	Control	3	0.231033
TABARCA	6	Fertilized	1	0.168292
TABARCA	6	Fertilized	2	0.372317
TABARCA	6	Fertilized	3	0.39345

## Sheet: LEAF-CN
LOCATION	SITE	TREATMENT	PLOT	C:N-leaves
CIMAR	1	Control	1	51.2955
CIMAR	1	Control	2	55.6151
CIMAR	1	Control	3	48.2861
CIMAR	1	Fertilized	1	38.1181
CIMAR	1	Fertilized	2	28.1944
CIMAR	1	Fertilized	3	48.9211
CIMAR	2	Control	1	50.3595
CIMAR	2	Control	2	44.0795
CIMAR	2	Control	3	47.842
CIMAR	2	Fertilized	1	36.1476
CIMAR	2	Fertilized	2	34.1047
CIMAR	2	Fertilized	3	46.3091
CIMAR	3	Control	1	50.9889
CIMAR	3	Control	2	42.4125
CIMAR	3	Control	3	48.9806
CIMAR	3	Fertilized	1	52.2333
CIMAR	3	Fertilized	2	39.8904
CIMAR	3	Fertilized	3	41.3689
Tabarca	4	Control	1	38.1593
Tabarca	4	Control	2	37.562
Tabarca	4	Control	3	36.9647
Tabarca	4	Fertilized	1	24.7921
Tabarca	4	Fertilized	2	27.4163
Tabarca	4	Fertilized	3	28.3772
Tabarca	5	Control	1	67.4206
Tabarca	5	Control	2	45.1869
Tabarca	5	Control	3	44.5833
Tabarca	5	Fertilized	1	46.9079
Tabarca	5	Fertilized	2	49.2436
Tabarca	5	Fertilized	3	38.4443
Tabarca	6	Control	1	40.7354
Tabarca	6	Control	2	68.9339
Tabarca	6	Control	3	71.254
Tabarca	6	Fertilized	1	35.7407
Tabarca	6	Fertilized	2	48.1396
Tabarca	6	Fertilized	3	39.2115

## Sheet: EPIPHYTES-CN
LOCATION	SITE	TREATMENT	PLOT	C:N-epiphytes
CIMAR	1	Control	1	20.3055
CIMAR	1	Control	2	17.3462
CIMAR	1	Control	3	18.881
CIMAR	1	Fertilized	1	21.3537
CIMAR	1	Fertilized	2	22.8944
CIMAR	1	Fertilized	3	18.21
CIMAR	2	Control	1	21.9538
CIMAR	2	Control	2	14.036
CIMAR	2	Control	3	18.7917
CIMAR	2	Fertilized	1	17.7127
CIMAR	2	Fertilized	2	16.2863
CIMAR	2	Fertilized	3	21.495
CIMAR	3	Control	1	22.2464
CIMAR	3	Control	2	18.2427
CIMAR	3	Control	3	18.5033
CIMAR	3	Fertilized	1	21.5
CIMAR	3	Fertilized	2	19.0299
CIMAR	3	Fertilized	3	20.9326
TABARCA	4	Control	1	8.41071
TABARCA	4	Control	2	8.82639
TABARCA	4	Control	3	9.24206
TABARCA	4	Fertilized	1	9.97836
TABARCA	4	Fertilized	2	8.2507
TABARCA	4	Fertilized	3	10.0951
TABARCA	5	Control	1	23.3502
TABARCA	5	Control	2	18.8184
TABARCA	5	Control	3	16.14
TABARCA	5	Fertilized	1	19.6257
TABARCA	5	Fertilized	2	18.3076
TABARCA	5	Fertilized	3	14.0994
TABARCA	6	Control	1	15.4016
TABARCA	6	Control	2	18.9987
TABARCA	6	Control	3	21.6033
TABARCA	6	Fertilized	1	16.785
TABARCA	6	Fertilized	2	22.9722
TABARCA	6	Fertilized	3	18.2496

## Sheet: CONSUMPTION
LOCATION	SITE	TREATMENT	PLOT	Consumption (cm2/shoot/day)
CIMAR	1	Control	1	0
CIMAR	1	Control	2	0
CIMAR	1	Control	3	0
CIMAR	1	Fertilized	1	0.00789392
CIMAR	1	Fertilized	2	0
CIMAR	1	Fertilized	3	0.00259527
CIMAR	2	Control	1	0
CIMAR	2	Control	2	0.0336318
CIMAR	2	Control	3	0
CIMAR	2	Fertilized	1	0
CIMAR	2	Fertilized	2	3.32829
CIMAR	2	Fertilized	3	0
CIMAR	3	Control	1	0
CIMAR	3	Control	2	0
CIMAR	3	Control	3	0
CIMAR	3	Fertilized	1	0
CIMAR	3	Fertilized	2	0
CIMAR	3	Fertilized	3	0
TABARCA	4	Control	1	0.00773902
TABARCA	4	Control	2	0
TABARCA	4	Control	3	0.474896
TABARCA	4	Fertilized	1	0
TABARCA	4	Fertilized	2	0
TABARCA	4	Fertilized	3	0
TABARCA	5	Control	1	0.00245531
TABARCA	5	Control	2	0
TABARCA	5	Control	3	0
TABARCA	5	Fertilized	1	0
TABARCA	5	Fertilized	2	0.859258
TABARCA	5	Fertilized	3	0
TABARCA	6	Control	1	0
TABARCA	6	Control	2	0.0494063
TABARCA	6	Control	3	0
TABARCA	6	Fertilized	1	0
TABARCA	6	Fertilized	2	0
TABARCA	6	Fertilized	3	0.0109037

## Sheet: FOOD CHOICE
LOCATION	TREATMENT	REPLICATE	Consumption (cm2/leaf/day)
CIMAR	CONTROL	1	0
CIMAR	CONTROL	2	0.000887278
CIMAR	CONTROL	3	0
CIMAR	CONTROL	4	0
CIMAR	CONTROL	5	0.161233
CIMAR	CONTROL	6	0
CIMAR	CONTROL	7	0
CIMAR	CONTROL	8	0
CIMAR	CONTROL	9	0
CIMAR	FERTILIZED	1	0
CIMAR	FERTILIZED	2	0
CIMAR	FERTILIZED	3	0
CIMAR	FERTILIZED	4	0
CIMAR	FERTILIZED	5	0
CIMAR	FERTILIZED	6	0.475132
CIMAR	FERTILIZED	7	0.317808
CIMAR	FERTILIZED	8	0
CIMAR	FERTILIZED	9	0
TABARCA	CONTROL	1	0.00140882
TABARCA	CONTROL	2	0.00417892
TABARCA	CONTROL	3	0
TABARCA	CONTROL	4	0
TABARCA	CONTROL	5	0
TABARCA	CONTROL	6	0.00279563
TABARCA	CONTROL	7	0
TABARCA	CONTROL	8	0
TABARCA	CONTROL	9	0
TABARCA	FERTILIZED	1	0.000899157
TABARCA	FERTILIZED	2	0
TABARCA	FERTILIZED	3	0.000573402
TABARCA	FERTILIZED	4	0
TABARCA	FERTILIZED	5	0
TABARCA	FERTILIZED	6	0.00806675
TABARCA	FERTILIZED	7	0.257209
TABARCA	FERTILIZED	8	0.000655401
TABARCA	FERTILIZED	9	0
