# Supplementary material for: Lack of Impact of Posidonia oceanica Leaf Nutrient Enrichment on Sarpa salpa Herbivory: Additional Evidence for the Generalist Consumer Behavior of This Cornerstone Mediterranean Herbivore
Source: PLoS One. 2016 Dec 19;11(12):e0168398. doi: 10.1371/journal.pone.0168398 (PMC5167388; doi:10.1371/journal.pone.0168398)
Supplement: S4 Data — (XLSX) [file pone.0168398.s004.xlsx]

## Sheet: CONSUMPTION
LOCATION	SITE	TREATMENT	PLOT	Consumption (cm2/shoot/day)
CIMAR	1	Control	1	0
CIMAR	1	Control	2	0
CIMAR	1	Control	3	0
CIMAR	1	Fertilized	1	0.00789392
CIMAR	1	Fertilized	2	0
CIMAR	1	Fertilized	3	0.00259527
CIMAR	2	Control	1	0
CIMAR	2	Control	2	0.0336318
CIMAR	2	Control	3	0
CIMAR	2	Fertilized	1	0
CIMAR	2	Fertilized	2	3.32829
CIMAR	2	Fertilized	3	0
CIMAR	3	Control	1	0
CIMAR	3	Control	2	0
CIMAR	3	Control	3	0
CIMAR	3	Fertilized	1	0
CIMAR	3	Fertilized	2	0
CIMAR	3	Fertilized	3	0
TABARCA	4	Control	1	0.00773902
TABARCA	4	Control	2	0
TABARCA	4	Control	3	0.474896
TABARCA	4	Fertilized	1	0
TABARCA	4	Fertilized	2	0
TABARCA	4	Fertilized	3	0
TABARCA	5	Control	1	0.00245531
TABARCA	5	Control	2	0
TABARCA	5	Control	3	0
TABARCA	5	Fertilized	1	0
TABARCA	5	Fertilized	2	0.859258
TABARCA	5	Fertilized	3	0
TABARCA	6	Control	1	0
TABARCA	6	Control	2	0.0494063
TABARCA	6	Control	3	0
TABARCA	6	Fertilized	1	0
TABARCA	6	Fertilized	2	0
TABARCA	6	Fertilized	3	0.0109037
