# Supplementary material for: Lack of Impact of Posidonia oceanica Leaf Nutrient Enrichment on Sarpa salpa Herbivory: Additional Evidence for the Generalist Consumer Behavior of This Cornerstone Mediterranean Herbivore
Source: PLoS One. 2016 Dec 19;11(12):e0168398. doi: 10.1371/journal.pone.0168398 (PMC5167388; doi:10.1371/journal.pone.0168398)
Supplement: S5 Data — (XLSX) [file pone.0168398.s005.xlsx]

## Sheet: FOOD CHOICE
LOCATION	TREATMENT	REPLICATE	Consumption (cm2/leaf.day)
CIMAR	CONTROL	1	0
CIMAR	CONTROL	2	0.000887278
CIMAR	CONTROL	3	0
CIMAR	CONTROL	4	0
CIMAR	CONTROL	5	0.161233
CIMAR	CONTROL	6	0
CIMAR	CONTROL	7	0
CIMAR	CONTROL	8	0
CIMAR	CONTROL	9	0
CIMAR	FERTILIZED	1	0
CIMAR	FERTILIZED	2	0
CIMAR	FERTILIZED	3	0
CIMAR	FERTILIZED	4	0
CIMAR	FERTILIZED	5	0
CIMAR	FERTILIZED	6	0.475132
CIMAR	FERTILIZED	7	0.317808
CIMAR	FERTILIZED	8	0
CIMAR	FERTILIZED	9	0
TABARCA	CONTROL	1	0.00140882
TABARCA	CONTROL	2	0.00417892
TABARCA	CONTROL	3	0
TABARCA	CONTROL	4	0
TABARCA	CONTROL	5	0
TABARCA	CONTROL	6	0.00279563
TABARCA	CONTROL	7	0
TABARCA	CONTROL	8	0
TABARCA	CONTROL	9	0
TABARCA	FERTILIZED	1	0.000899157
TABARCA	FERTILIZED	2	0
TABARCA	FERTILIZED	3	0.000573402
TABARCA	FERTILIZED	4	0
TABARCA	FERTILIZED	5	0
TABARCA	FERTILIZED	6	0.00806675
TABARCA	FERTILIZED	7	0.257209
TABARCA	FERTILIZED	8	0.000655401
TABARCA	FERTILIZED	9	0
